# Supplementary material for: Midlatitude atmospheric circulation responses under 1.5 °C and 2.0 °C warming and implications for regional impacts
Source: Copernicus journal article supplement (doi:10.5194/esd-2017-107), 2017-11-27
Supplement: Supplementary file 1 [file esd-2017-107-supplement.pdf]

# Supplement

## S1 Model biases

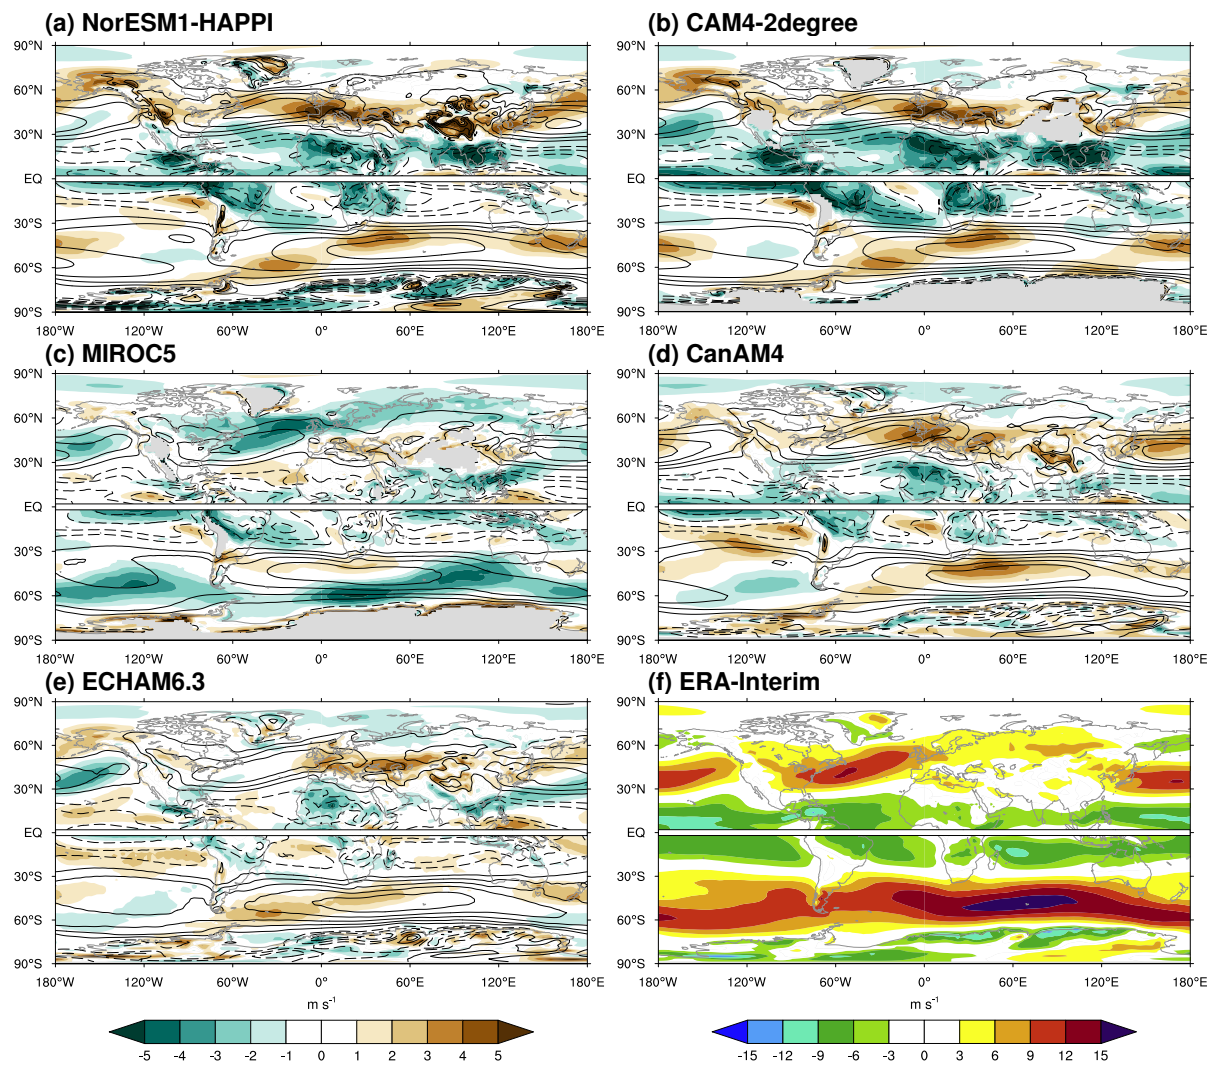

**Figure S1.1.** Model bias in winter (Northern Hemisphere DJF, Southern Hemisphere JJA) zonal wind at 850 hPa ( $u_{850}$ ) compared to ERA-Interim. (a)-(e) show the bias in individual models (shading; units  $\text{m s}^{-1}$ ) along with the ERA-Interim climatology (contour interval 3  $\text{m s}^{-1}$ ). (f) shows the ERA-Interim climatology.

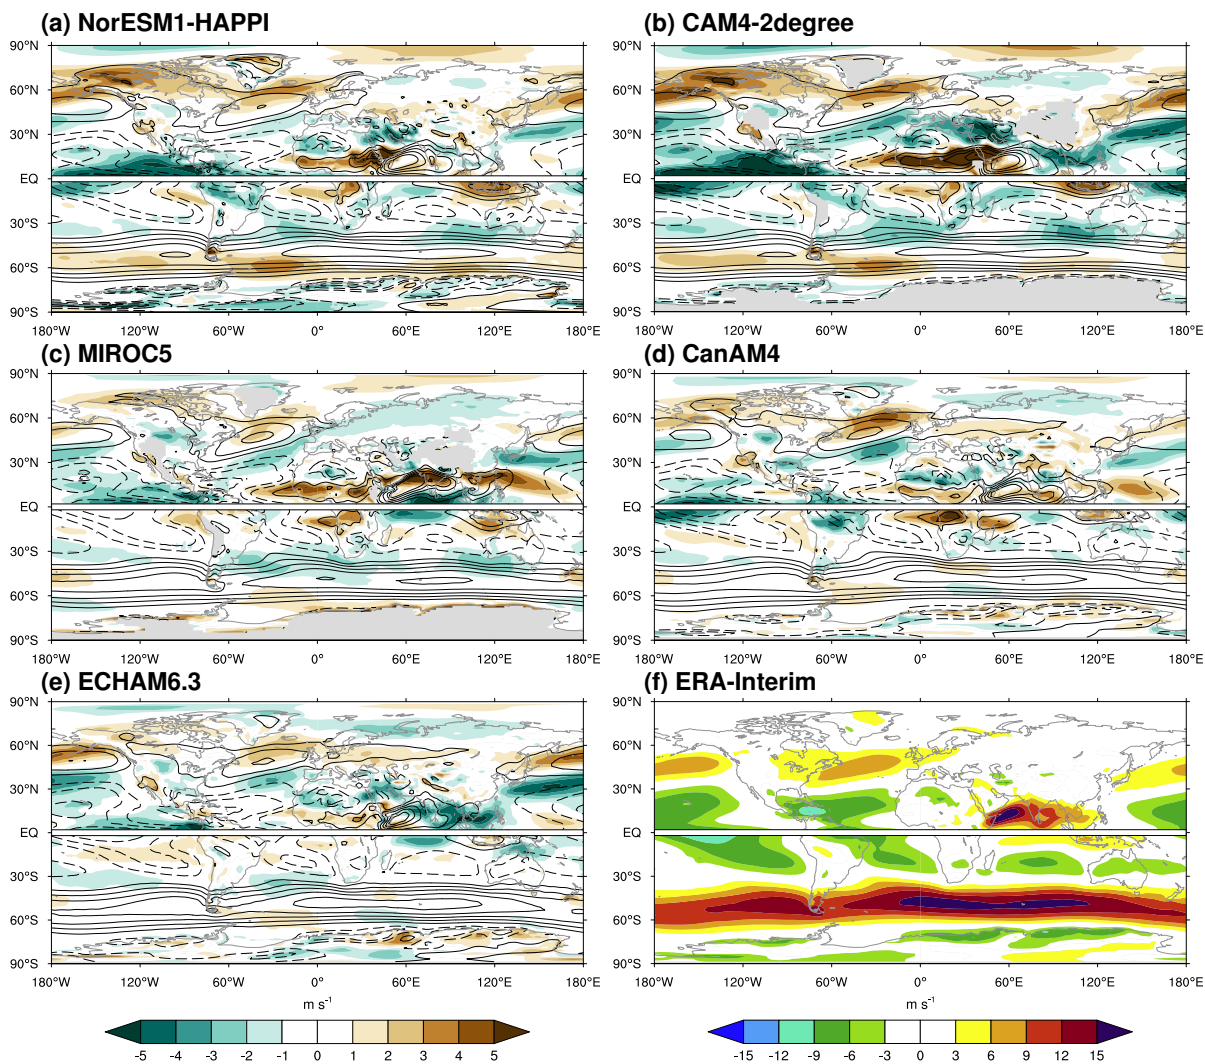

**Figure S1.2.** Model bias in summer (Northern Hemisphere JJA, Southern Hemisphere DJF) zonal wind at 850 hPa ( $u_{850}$ ) compared to ERA-Interim. (a)-(e) show the bias in individual models (shading; units  $\text{m s}^{-1}$ ) along with the ERA-Interim climatology (contour interval  $3 \text{ m s}^{-1}$ ). (f) shows the ERA-Interim climatology.

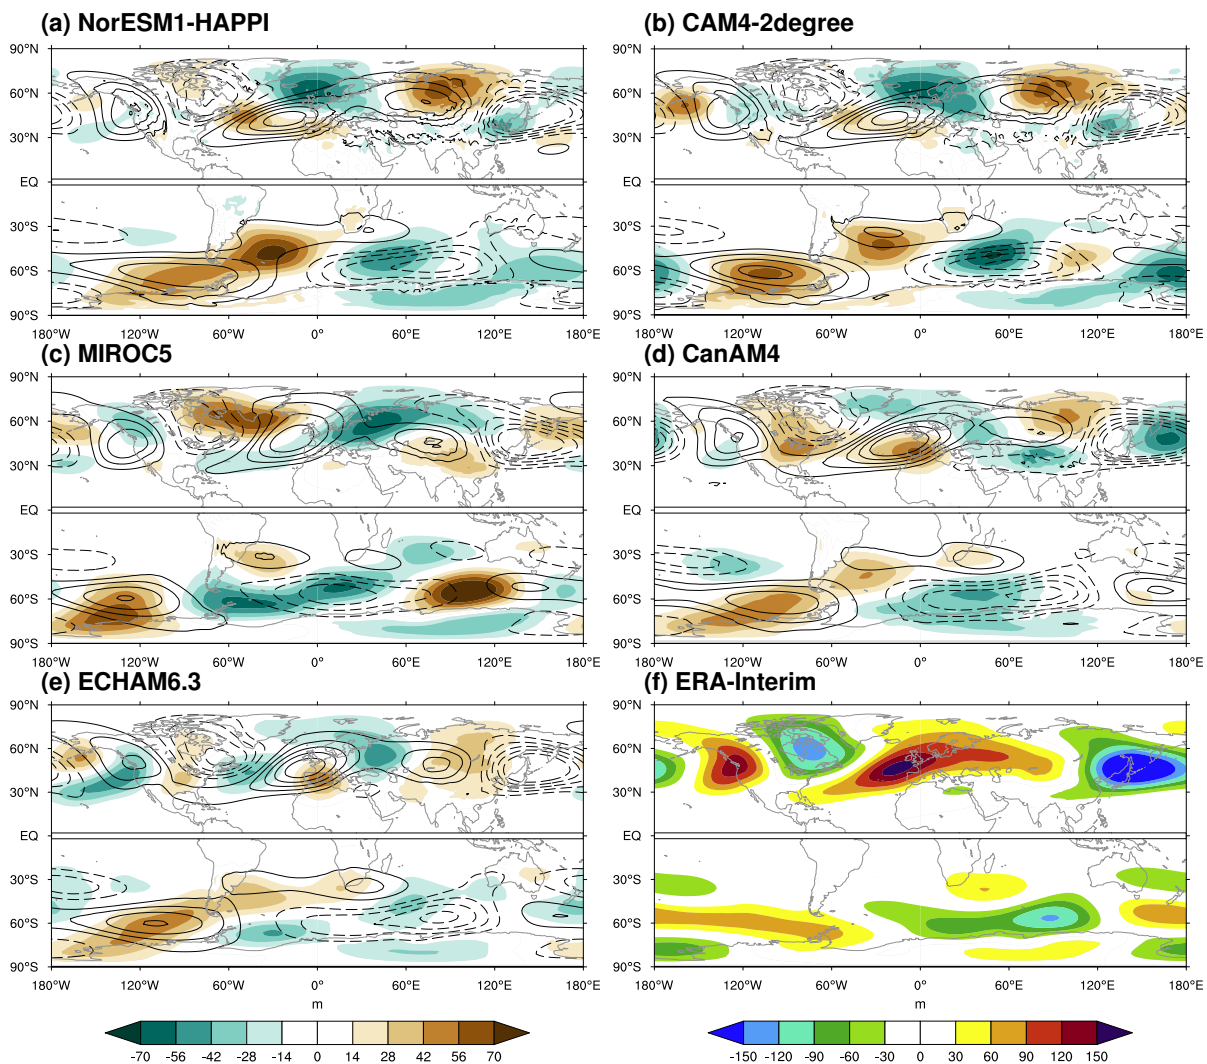

**Figure S1.3.** Model bias in winter (Northern Hemisphere DJF, Southern Hemisphere JJA) stationary waves at 500 hPa compared to ERA-Interim. (a)-(e) show the bias in individual models (shading; units m) along with the ERA-Interim climatology (contour interval 30 m). (f) shows the ERA-Interim climatology. Stationary waves are defined as departures from the zonal mean of geopotential height ( $Z^*$ ) at 500 hPa.

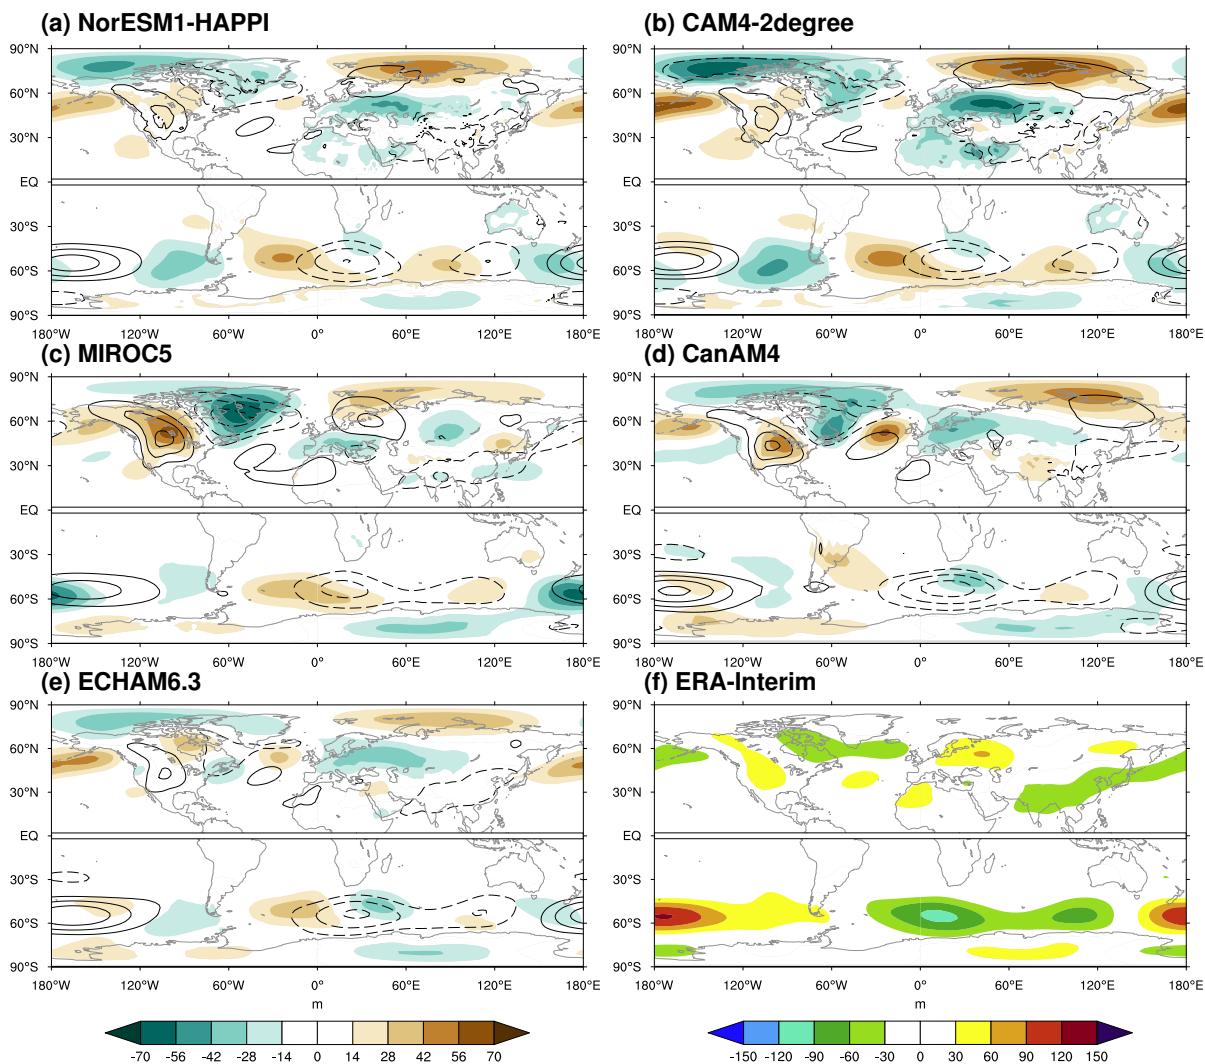

**Figure S1.4.** Model bias in summer (Northern Hemisphere JJA, Southern Hemisphere DJF) stationary waves at 500 hPa compared to ERA-Interim. (a)-(e) show the bias in individual models (shading; units m) along with the ERA-Interim climatology (contour interval 30 m). (f) shows the ERA-Interim climatology. Stationary waves are defined as departures from the zonal mean of geopotential height ( $Z^*$ ) at 500 hPa.

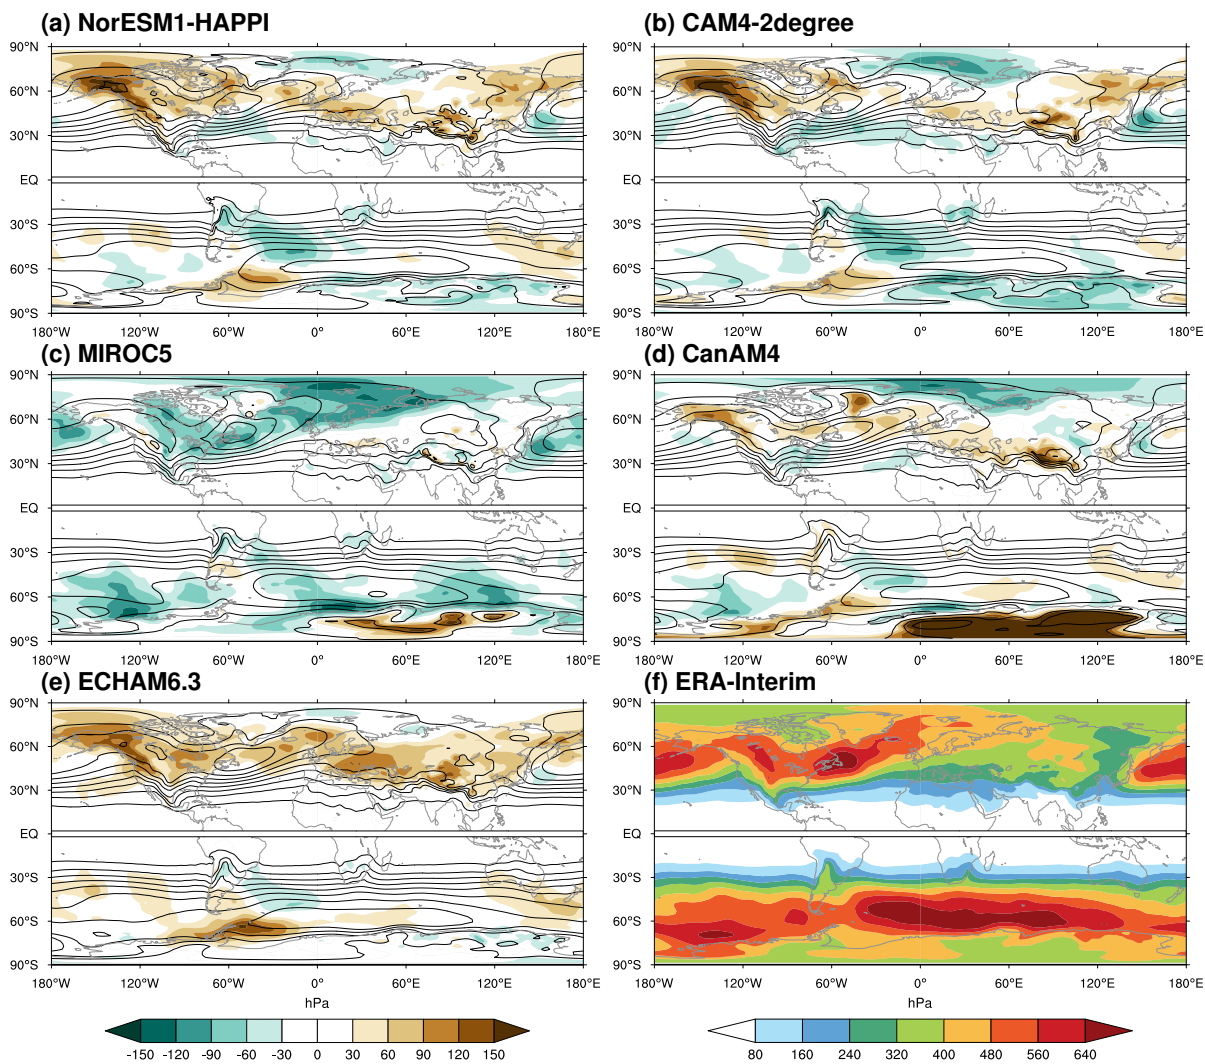

**Figure S1.5.** Model bias in winter (Northern Hemisphere DJF, Southern Hemisphere JJA) MSLP storm tracks compared to ERA-Interim. (a)-(e) show the bias in individual models (shading; units hPa) along with the ERA-Interim climatology (contour interval 80 hPa). (f) shows the ERA-Interim climatology. The storm tracks are defined as the standard deviation of bandpass filtered daily MSLP.

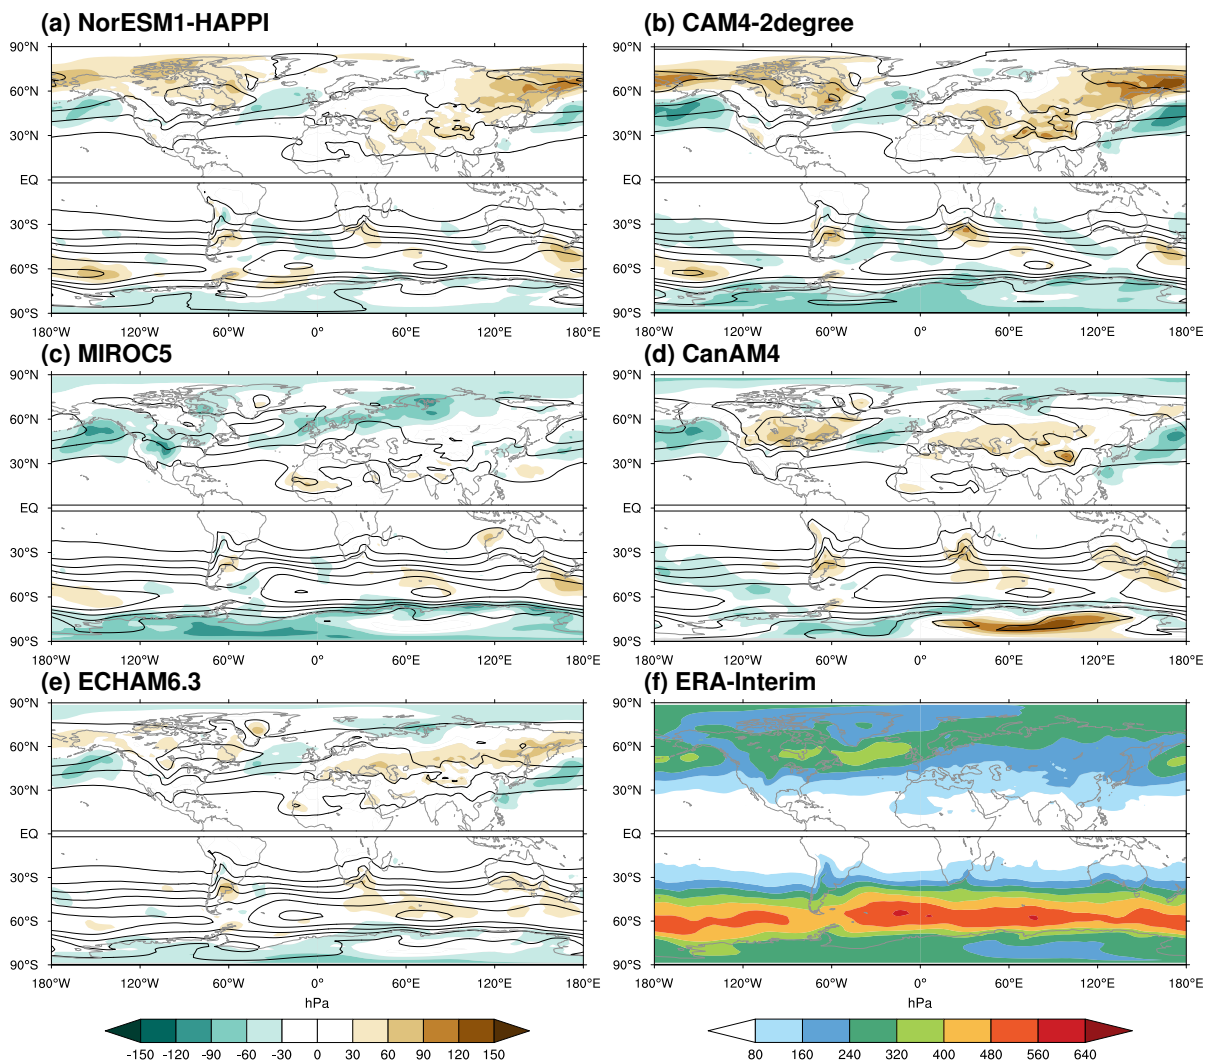

**Figure S1.6.** Model bias in summer (Northern Hemisphere JJA, Southern Hemisphere DJF) MSLP storm tracks compared to ERA-Interim. (a)-(e) show the bias in individual models (shading; units hPa) along with the ERA-Interim climatology (contour interval 80 hPa). (f) shows the ERA-Interim climatology. The storm tracks are defined as the standard deviation of bandpass filtered daily MSLP.

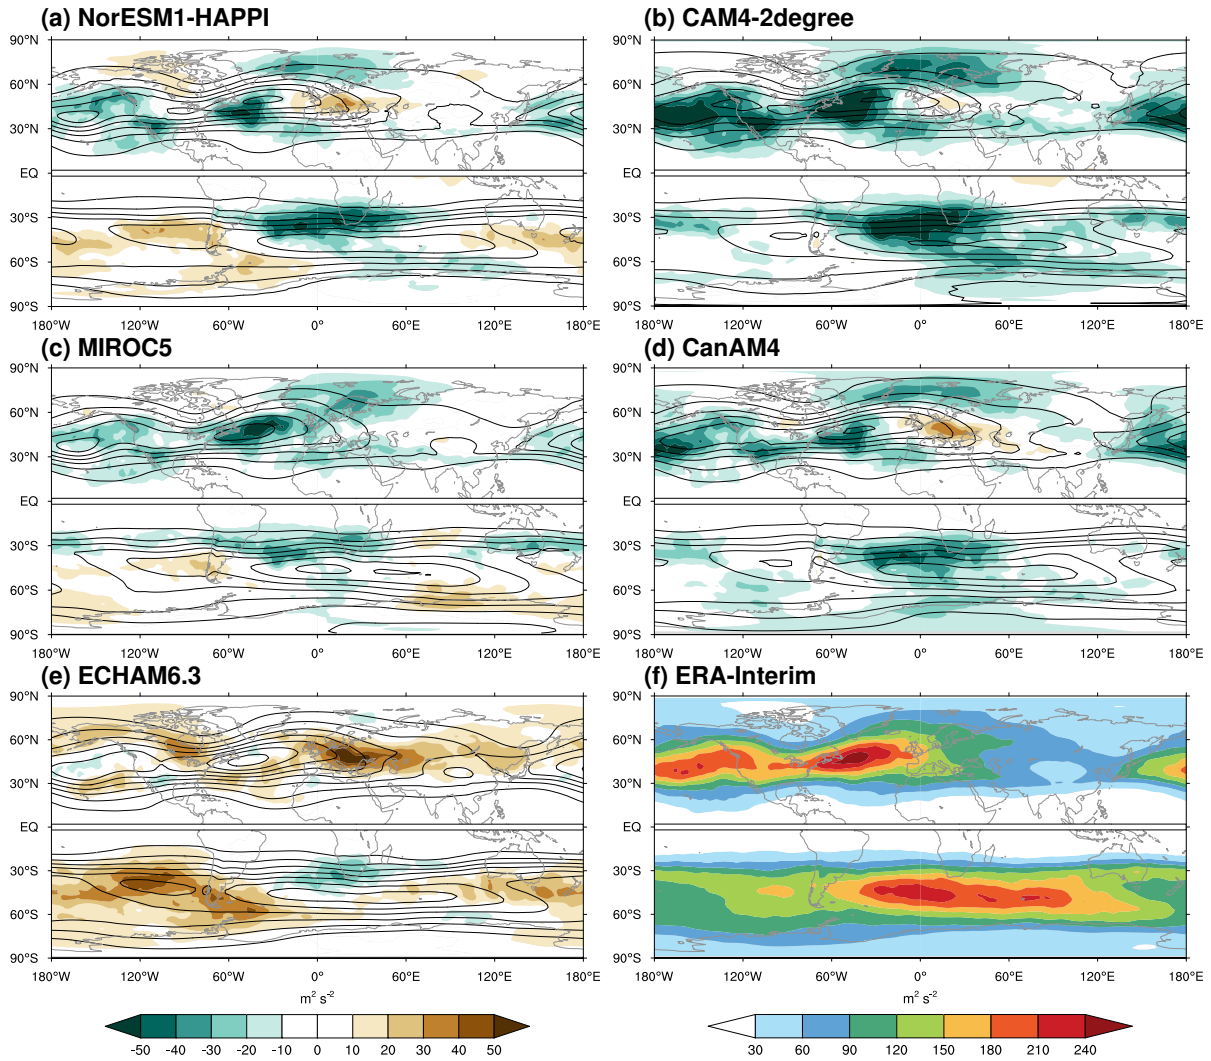

**Figure S1.7.** Model bias in winter (Northern Hemisphere DJF, Southern Hemisphere JJA) EKE storm tracks at 250 hPa ( $EKE_{250}$ ) compared to ERA-Interim. (a)-(e) show the bias in individual models (shading; units  $m^2 s^{-2}$ ) along with the ERA-Interim climatology (contour interval  $30 m^2 s^{-2}$ ). (f) shows the ERA-Interim climatology (contour interval  $30 m^2 s^{-1}$ ). The storm tracks are defined as the variance of bandpass filtered daily EKE.

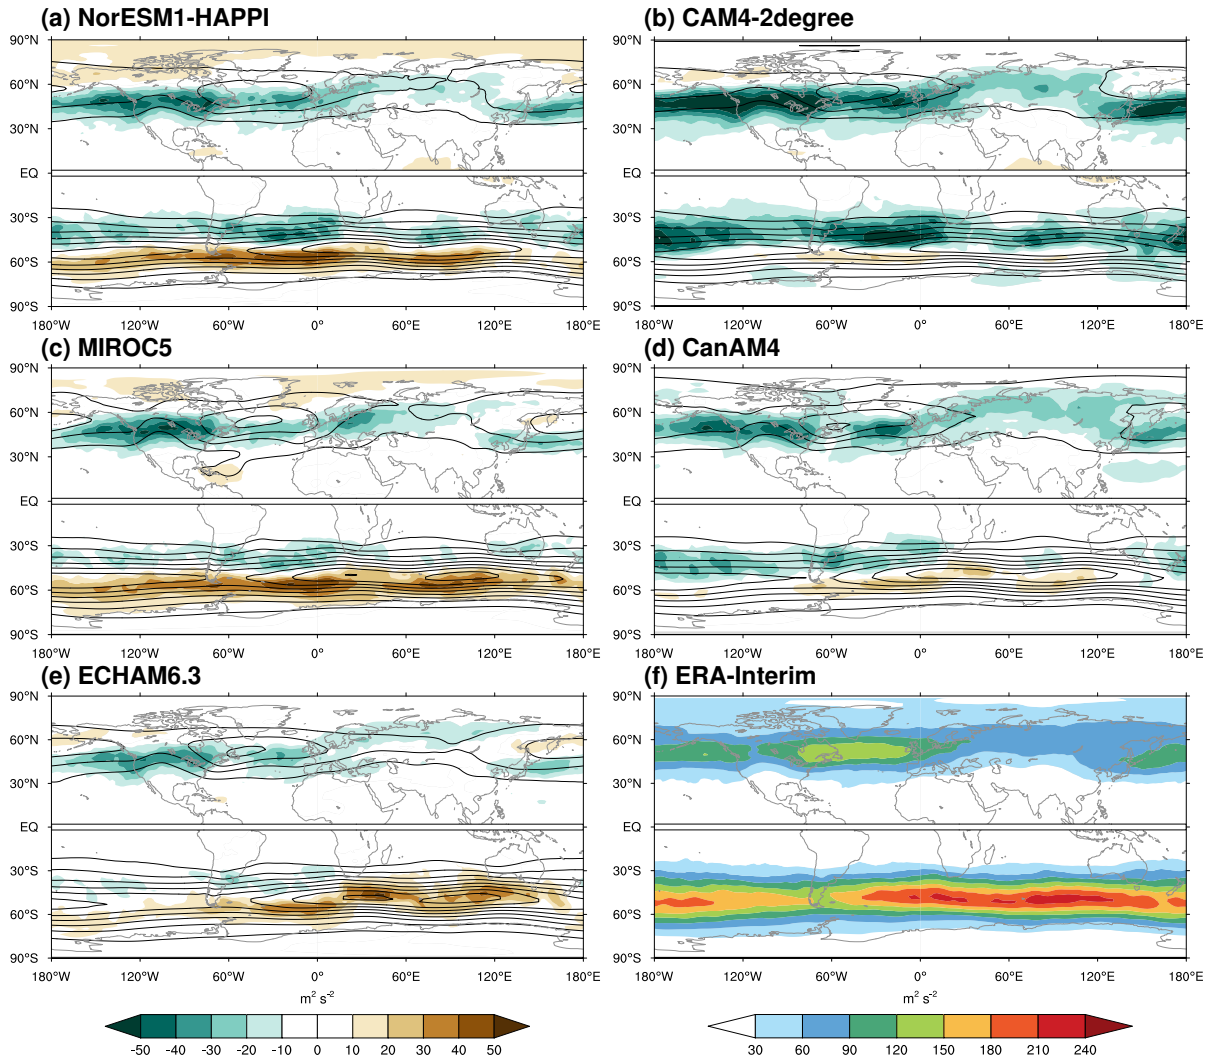

**Figure S1.8.** Model bias in summer (Northern Hemisphere DJF, Southern Hemisphere JJA) EKE storm tracks at 250 hPa ( $EKE_{250}$ ) compared to ERA-Interim. (a)-(e) show the bias in individual models (shading; units  $m^2 s^{-2}$ ) along with the ERA-Interim climatology (contour interval  $30 m^2 s^{-2}$ ). (f) shows the ERA-Interim climatology (contour interval  $30 m^2 s^{-1}$ ). The storm tracks are defined as the variance of bandpass filtered daily EKE.



## S2 Summer responses in circulation fields

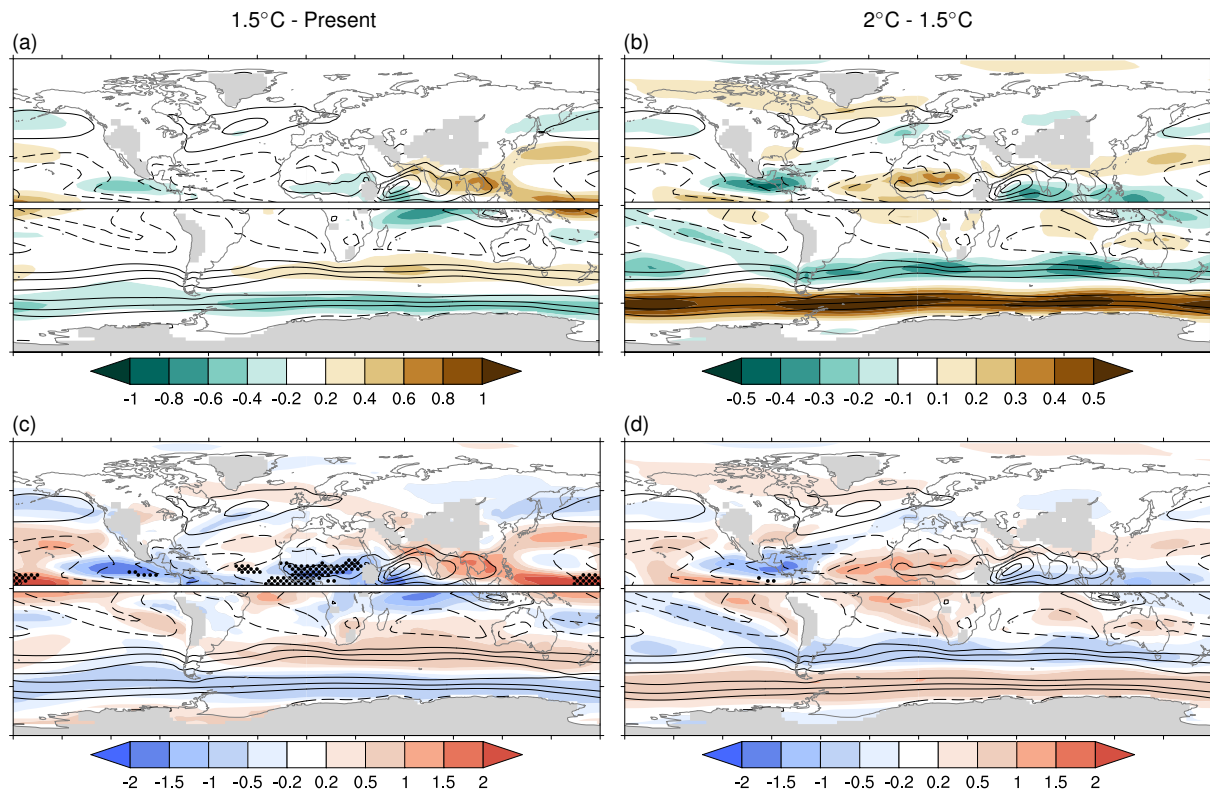

**Figure S2.1.** Response of summer (Northern Hemisphere JJA, Southern Hemisphere DJF) zonal wind at 850 hPa ( $u_{850}$ ) for 1.5°C–PD (left) and 2.0°C–1.5°C (right). Top panels show responses (shading; units  $\text{m s}^{-1}$ ) along with the climatology (contour interval  $4 \text{ m s}^{-1}$ ) for the (a) PD and (b) 1.5°C experiments. Bottom panels show signal-to-noise ratio  $\beta/\sigma$ , where the sign corresponds to the sign of the response. In (c) and (d), black dots (if present) mask out regions where consensus is low ( $f^2 > 1$ ) on the magnitude of the response; grey shading indicates regions of high topography intersecting the plotted variable.

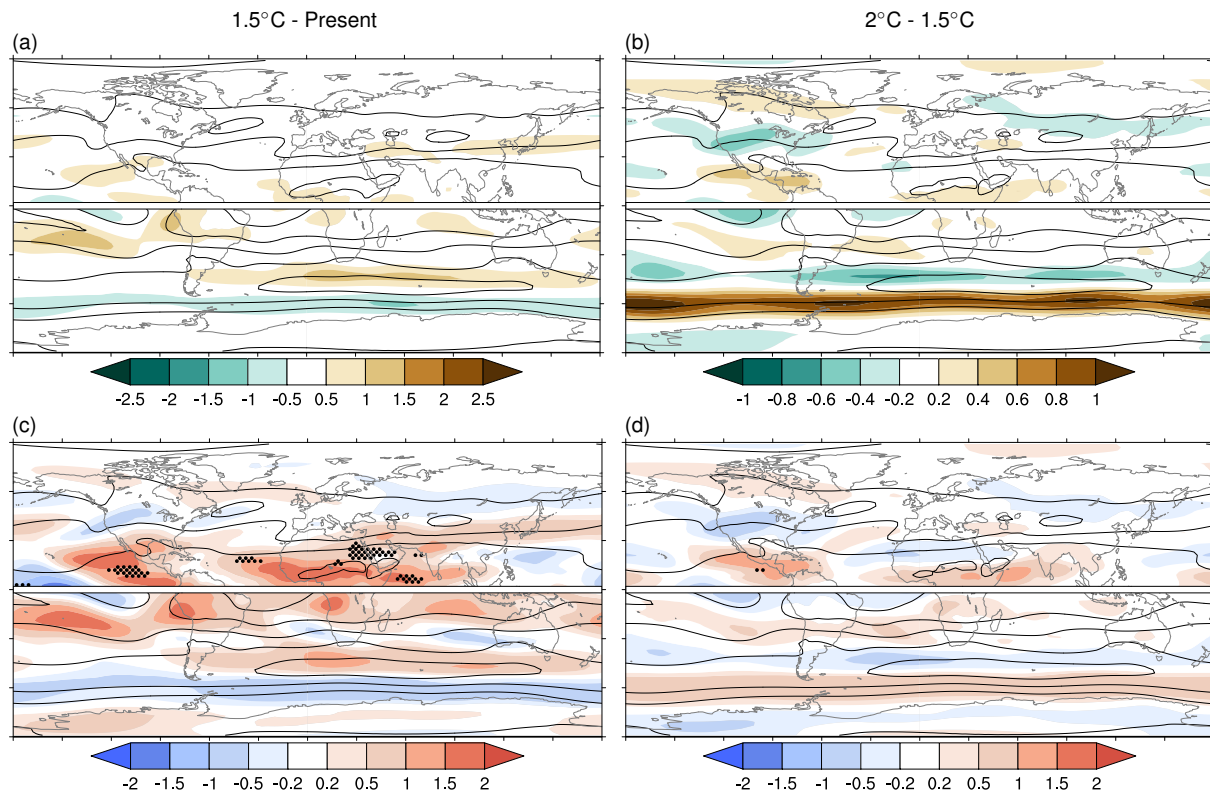

**Figure S2.2.** Response of summer (Northern Hemisphere JJA, Southern Hemisphere DJF) zonal wind at 250 hPa ( $u_{250}$ ) for 1.5°C–PD (left) and 2.0°C–1.5°C (right). Top panels show responses (shading; units  $\text{m s}^{-1}$ ) along with the climatology (contour interval  $10 \text{ m s}^{-1}$ ) for the (a) PD and (b) 1.5°C experiments. Bottom panels show signal-to-noise ratio  $\beta/\sigma$ , where the sign corresponds to the sign of the response. In (c) and (d), black dots (if present) mask out regions where consensus is low ( $f^2 > 1$ ) on the magnitude of the response.

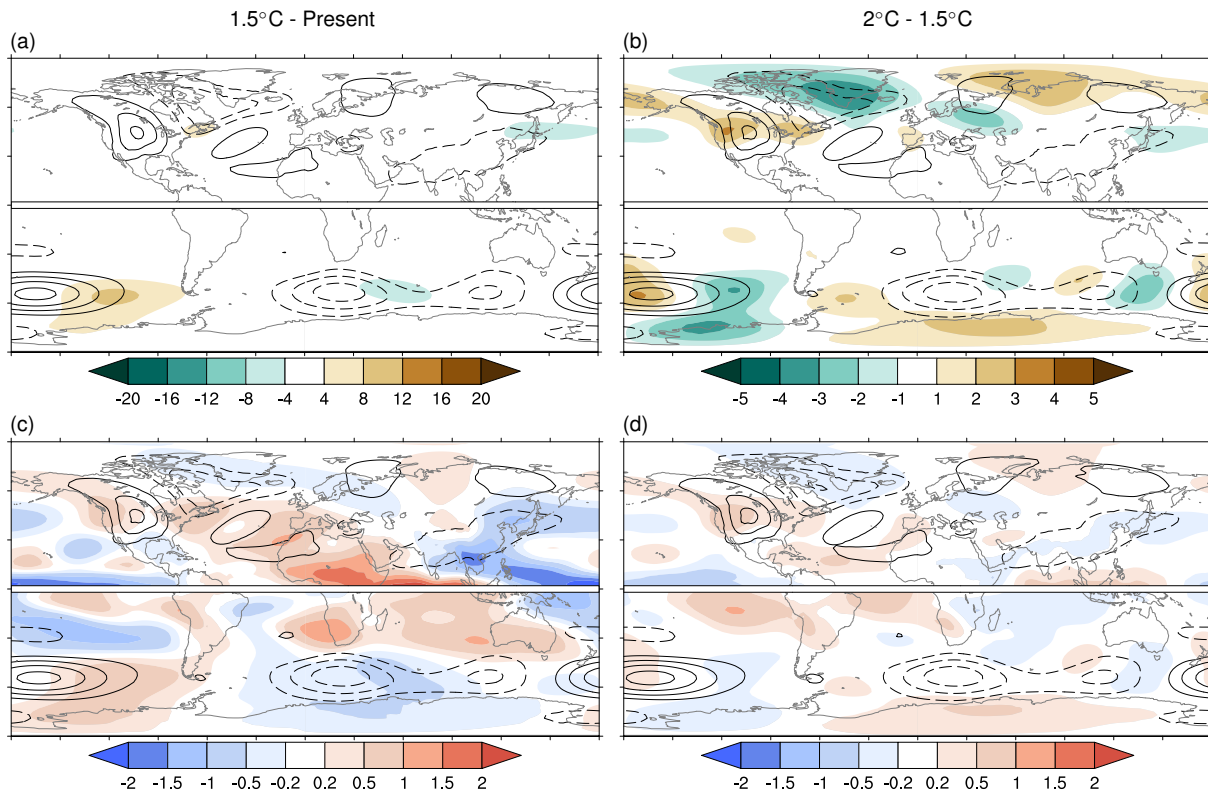

**Figure S2.3.** Response of summer (Northern Hemisphere JJA, Southern Hemisphere DJF) stationary waves at 500 hPa for 1.5°C–PD (left) and 2.0°C–1.5°C (right). Top panels show responses (shading; units m) along with the climatology (contour interval 25 m) for the (a) PD and (b) 1.5°C experiments. Bottom panels show signal-to-noise ratio  $\beta/\sigma$ , where the sign corresponds to the sign of the response. In (c) and (d), black dots (if present) mask out regions where consensus is low ( $f^2 > 1$ ) on the magnitude of the response. Stationary waves are defined as the departures from the zonal mean of geopotential height ( $Z^*$ ) at 500 hPa.

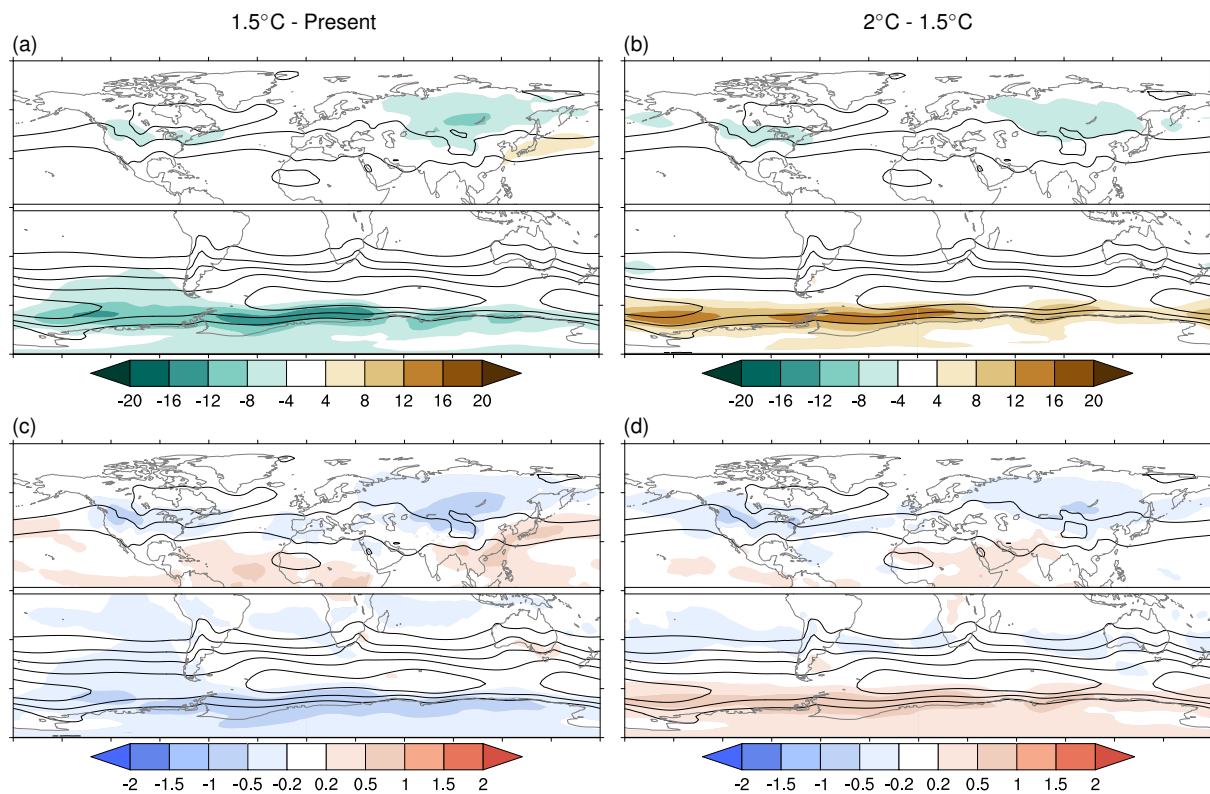

**Figure S2.4.** Response of summer (Northern Hemisphere JJA, Southern Hemisphere DJF) MSLP storm tracks for 1.5°C–PD (left) and 2.0°C–1.5°C (right). Top panels show responses (shading; units hPa) along with the climatology (contour interval 100 hPa) for the (a) PD and (b) 1.5°C experiments. Bottom panels show signal-to-noise ratio  $\beta/\sigma$ , where the sign corresponds to the sign of the response. In (c) and (d), black dots (if present) mask out regions where consensus is low ( $f^2 > 1$ ) on the magnitude of the response. The storm tracks are defined as the standard deviation of bandpass filtered daily MSLP.

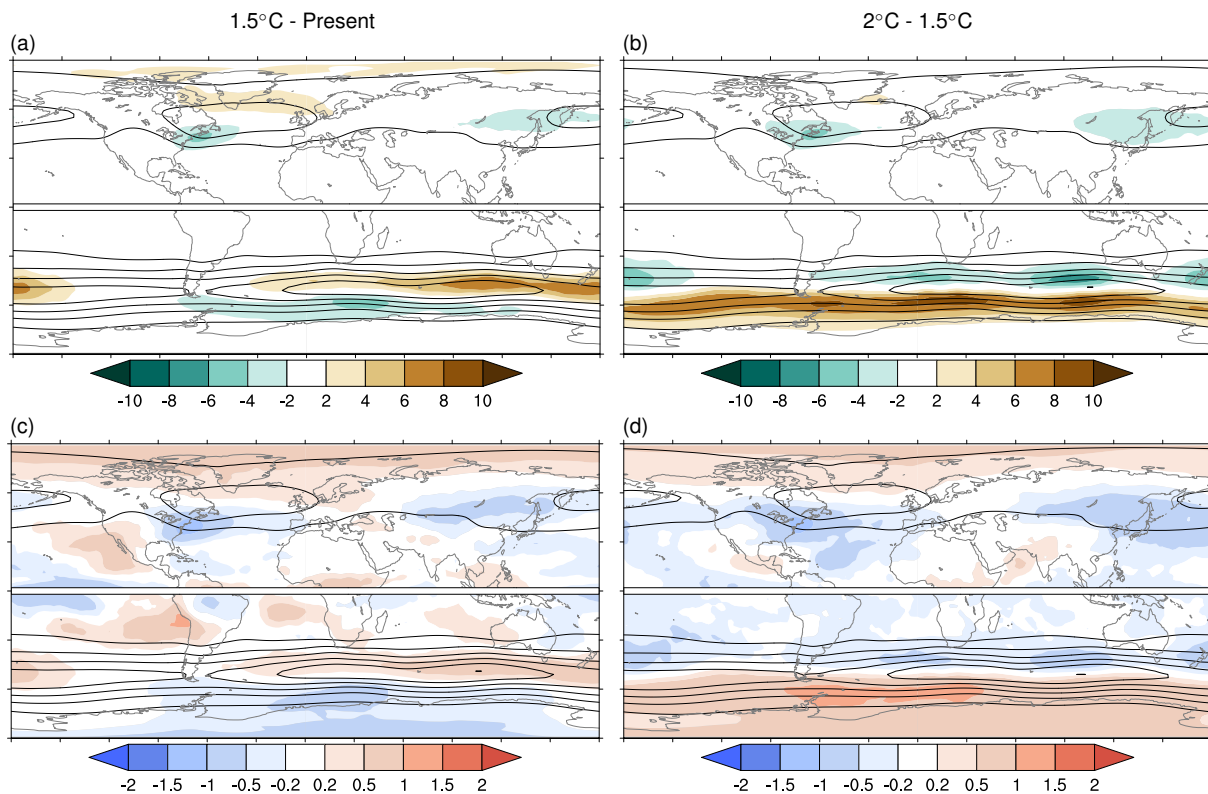

**Figure S2.5.** Response of summer (Northern Hemisphere JJA, Southern Hemisphere DJF) EKE storm tracks for 1.5°C–PD (left) and 2.0°C–1.5°C (right). Top panels show responses (shading; units hPa) along with the climatology (contour interval 100 hPa) for the (a) PD and (b) 1.5°C experiments. Bottom panels show signal-to-noise ratio  $\beta/\sigma$ , where the sign corresponds to the sign of the response. In (c) and (d), black dots (if present) mask out regions where consensus is low ( $f^2 > 1$ ) on the magnitude of the response. The storm tracks are defined as bandpass filtered daily EKE at 250 hPa.

### S3 2.0°C minus PD responses

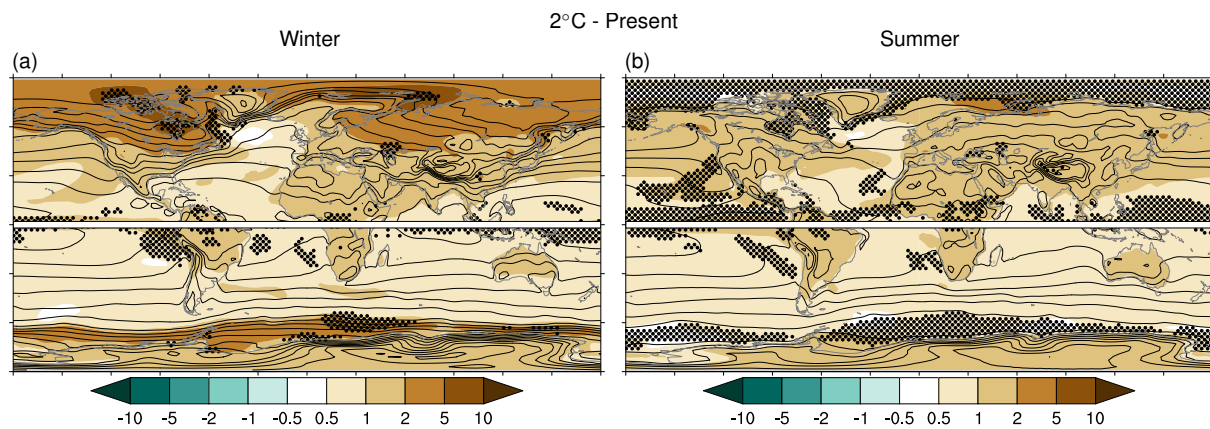

**Figure S3.1.** Response of winter (left) and summer (right) surface air temperature for 2.0°C–PD (shading; units K) along with the climatology (contour interval 5 K) for the PD experiment. Black dots (if present) mask out regions where consensus is low ( $f^2 > 1$ ) on the magnitude of the response.

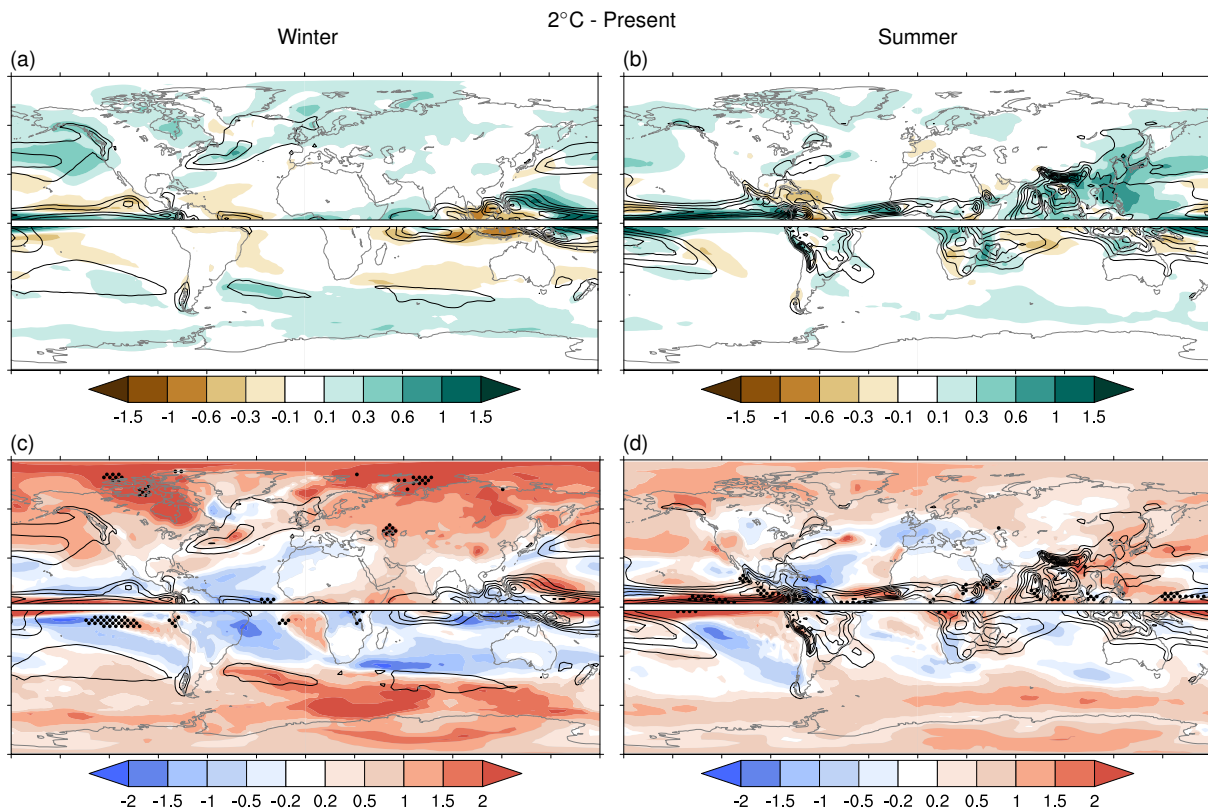

**Figure S3.2.** Response of winter (left) and summer (right) precipitation for 2.0°C–PD. Top panels show responses (shading; units  $\text{mm d}^{-1}$ ) along with the climatology (contour interval  $2 \text{ mm d}^{-1}$  starting from  $4 \text{ mm d}^{-1}$ ) for the PD experiment. Bottom panels show signal-to-noise ratio  $\beta/\sigma$ , where the sign corresponds to the sign of the response. In (c) and (d), black dots (if present) mask out regions where consensus is low ( $f^2 > 1$ ) on the magnitude of the response.

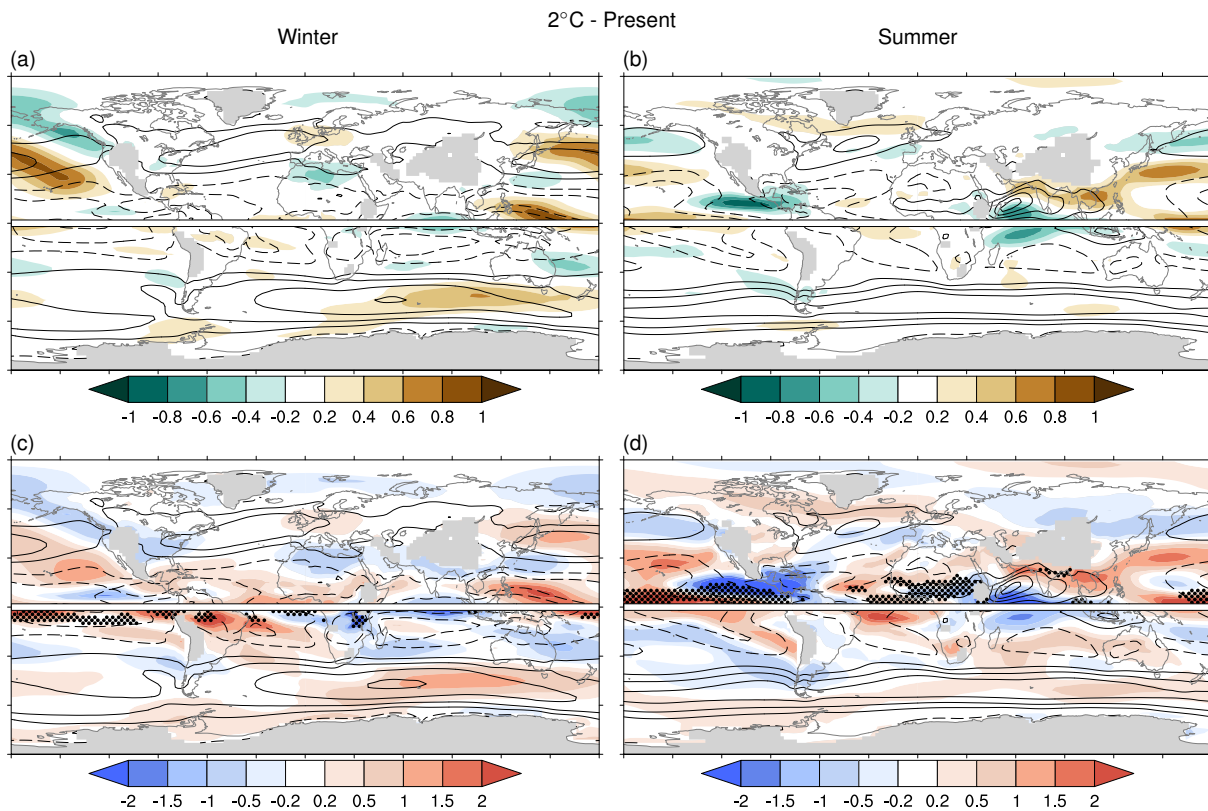

**Figure S3.3.** Response of winter (left) and summer (right) zonal wind at 850 hPa for 2.0°C–PD. Top panels show responses (shading; units  $\text{m s}^{-1}$ ) along with the climatology (contour interval  $4 \text{ m s}^{-1}$ ) for the PD experiment. Bottom panels show signal-to-noise ratio  $\beta/\sigma$ , where the sign corresponds to the sign of the response (shading; units  $\text{m s}^{-1}$ ). In (c) and (d), black dots (if present) mask out regions where consensus is low ( $f^2 > 1$ ) on the magnitude of the response; grey shading indicates regions of high topography intersecting the plotted variable.



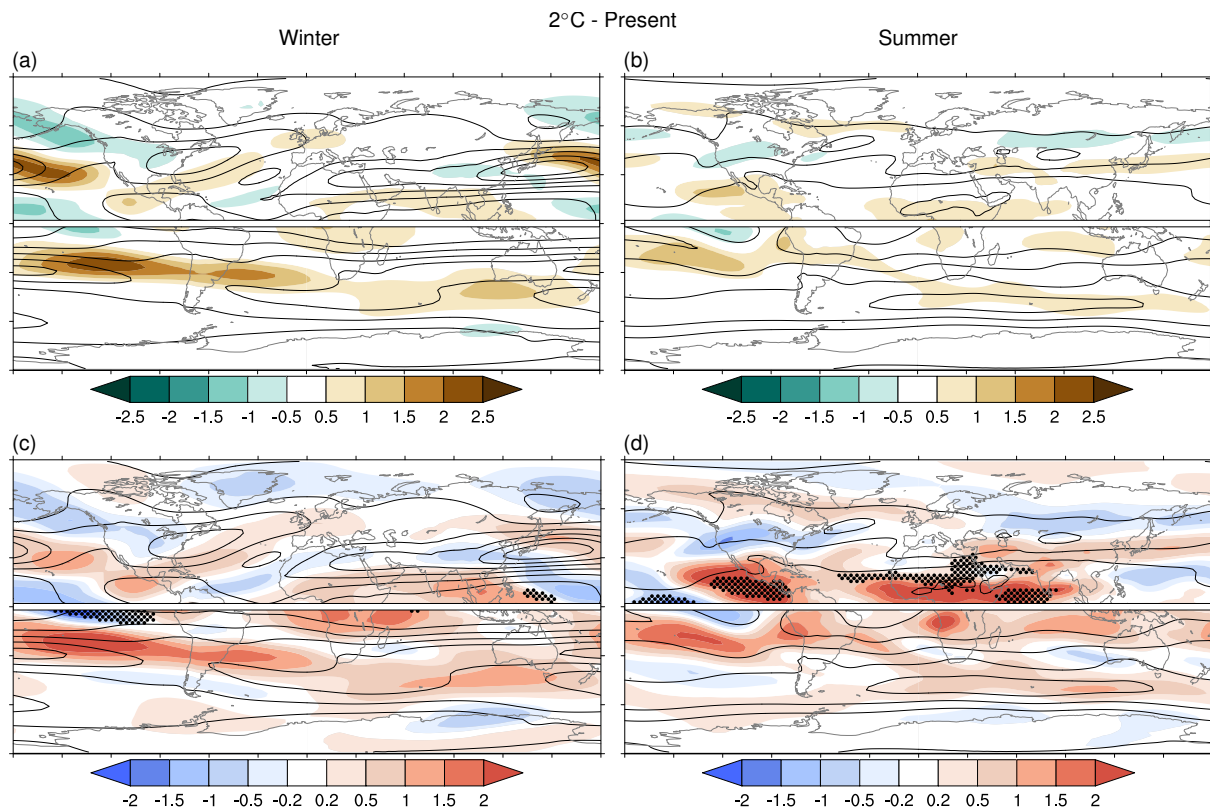

**Figure S3.4.** Response of winter (left) and summer (right) zonal wind at 250 hPa for 2.0°C–PD. Top panels show responses (shading; units  $\text{m s}^{-1}$ ) along with the climatology (contour interval  $10 \text{ m s}^{-1}$ ) for the PD experiment. Bottom panels show signal-to-noise ratio  $\beta/\sigma$ , where the sign corresponds to the sign of the response (shading; units  $\text{m s}^{-1}$ ). In (c) and (d), black dots (if present) mask out regions where consensus is low ( $f^2 > 1$ ) on the magnitude of the response.

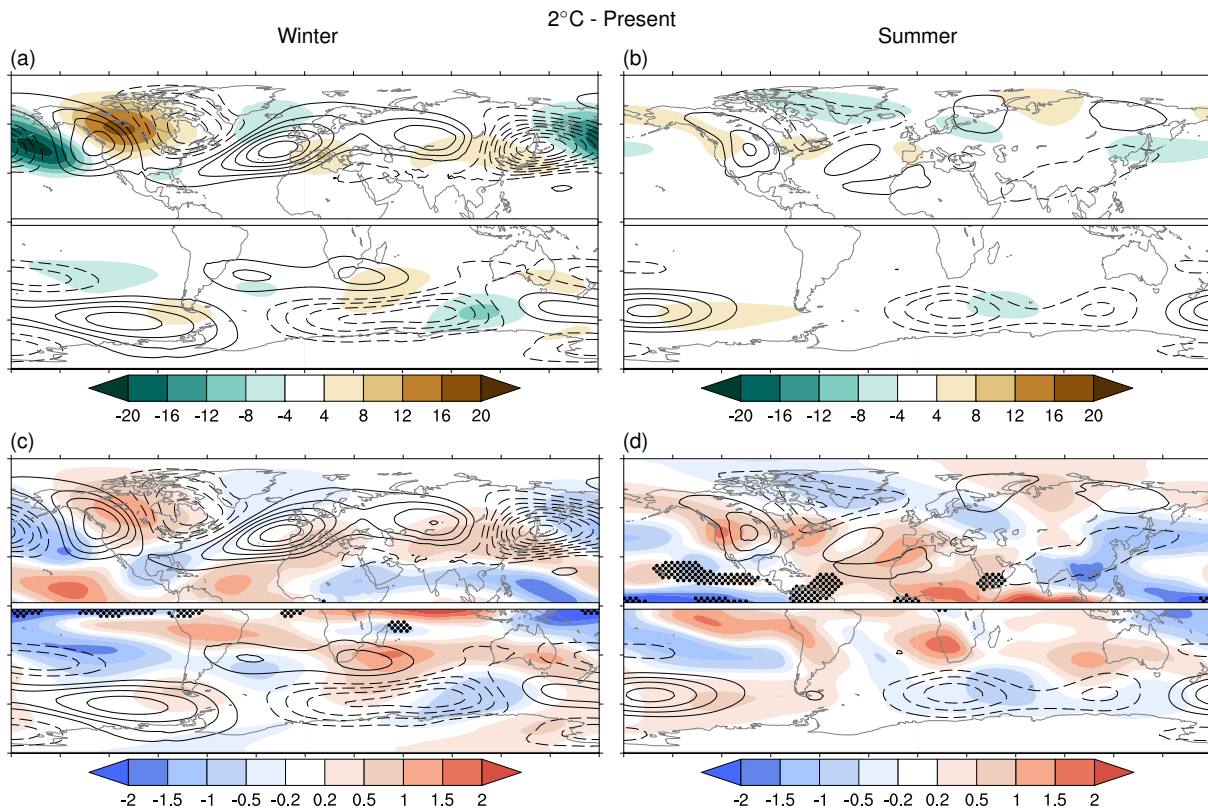

**Figure S3.5.** Response of winter (left) and summer (right) stationary waves at 500 hPa for 2.0°C–PD. Top panels show responses (shading; units m) along with the climatology (contour interval 25 m) for the PD experiment. Bottom panels show signal-to-noise ratio  $\beta/\sigma$ , where the sign corresponds to the sign of the response (shading; units m). In (c) and (d), black dots (if present) mask out regions where consensus is low ( $f^2 > 1$ ) on the magnitude of the response. Stationary waves are defined as departures from the zonal mean of geopotential height ( $Z^*$ ) at 500 hPa.

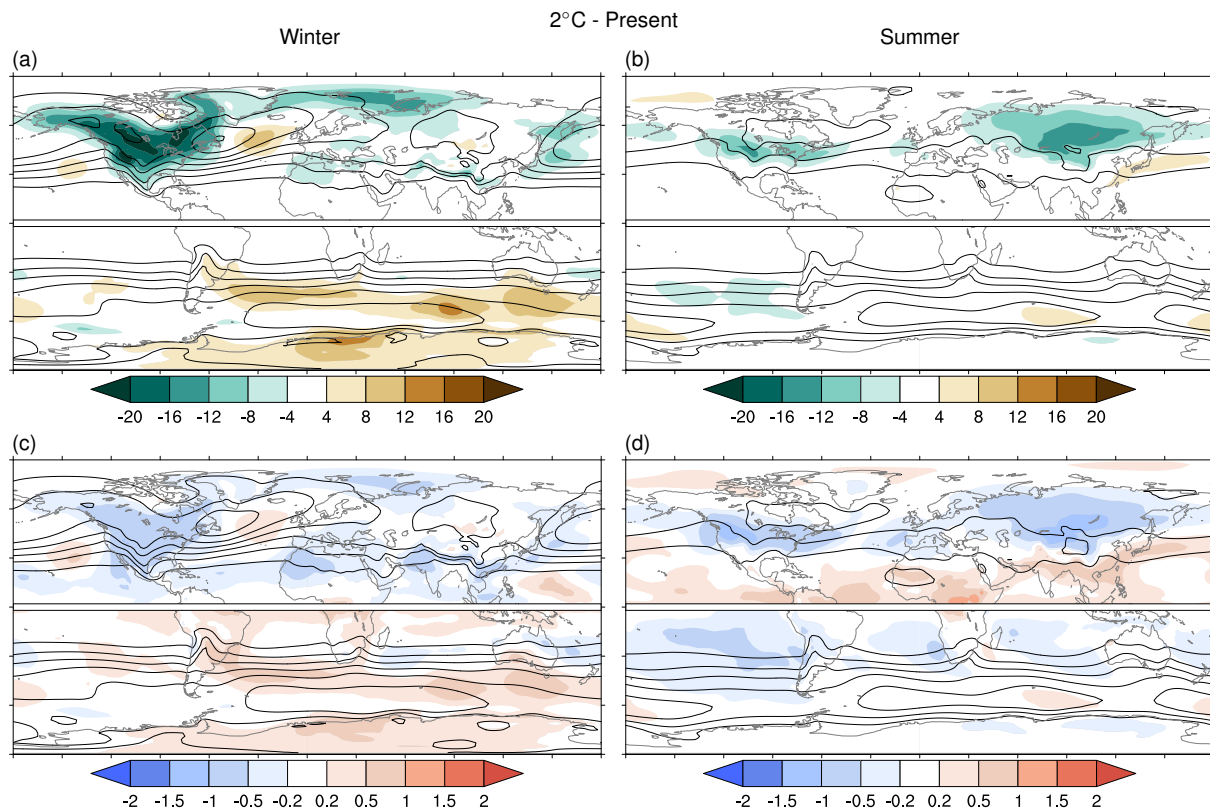

**Figure S3.6.** Response of winter (left) and summer (right) MSLP storm tracks for 2.0°C–PD. Top panels show responses (shading; units hPa) along with the climatology (contour interval 100 hPa) for the PD experiment. Bottom panels show signal-to-noise ratio  $\beta/\sigma$ , where the sign corresponds to the sign of the response (shading; units hPa). In (c) and (d), black dots (if present) mask out regions where consensus is low ( $f^2 > 1$ ) on the magnitude of the response.

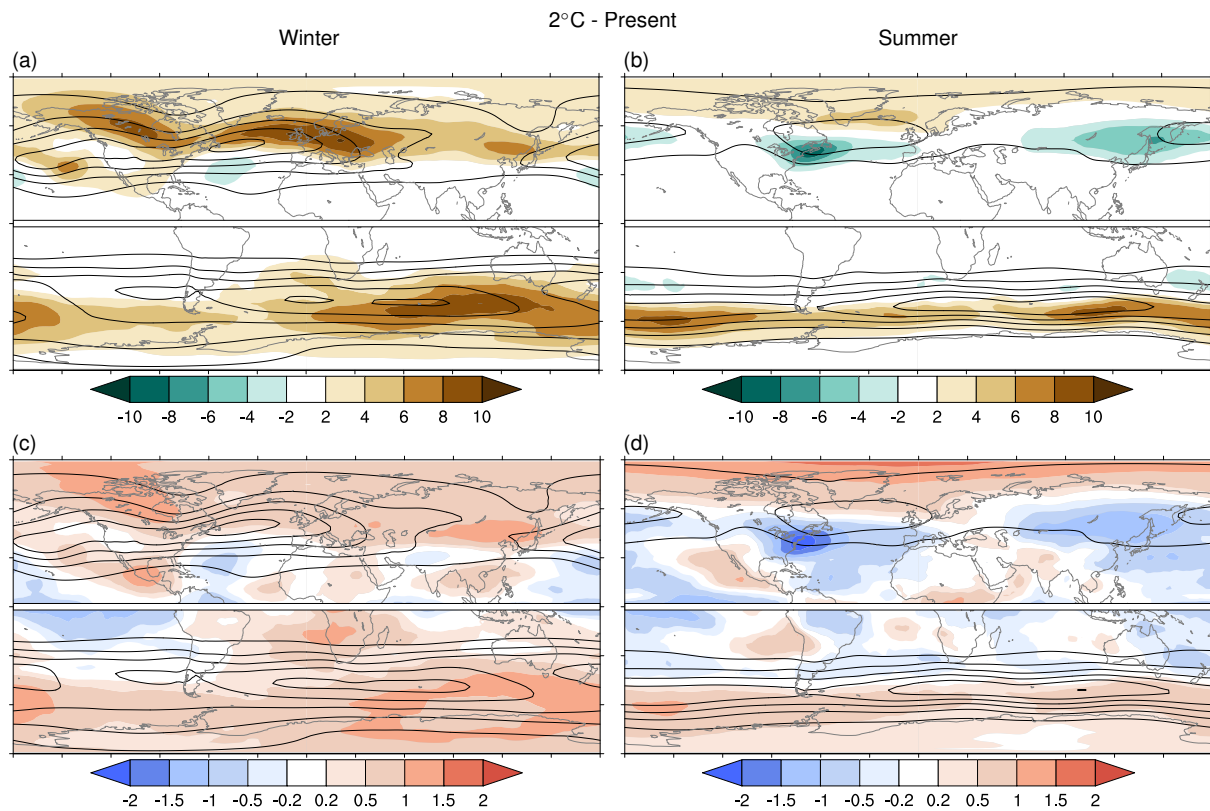

**Figure S3.7.** Response of winter (left) and summer (right) EKE storm tracks for 2.0°C–PD. Top panels show responses (shading; units  $\text{m}^2 \text{s}^{-2}$ ) along with the climatology (contour interval  $40 \text{ m}^2 \text{s}^{-2}$ ) for the PD experiment. Bottom panels show signal-to-noise ratio  $\beta/\sigma$ , where the sign corresponds to the sign of the response (shading; units  $\text{m}^2 \text{s}^{-2}$ ). In (c) and (d), black dots (if present) mask out regions where consensus is low ( $f^2 > 1$ ) on the magnitude of the response. The storm tracks are defined as bandpass filtered daily eddy kinetic energy at 200 hPa.
